# Supplementary material for: A Chip for Estrogen Receptor Action: Detection of Biomarkers Released by MCF-7 Cells through Estrogenic and Anti-Estrogenic Effects
Source: MDPI journal article supplement (doi:10.3390/s17081760), 2017-08-01
Supplement: s1 [file s1]

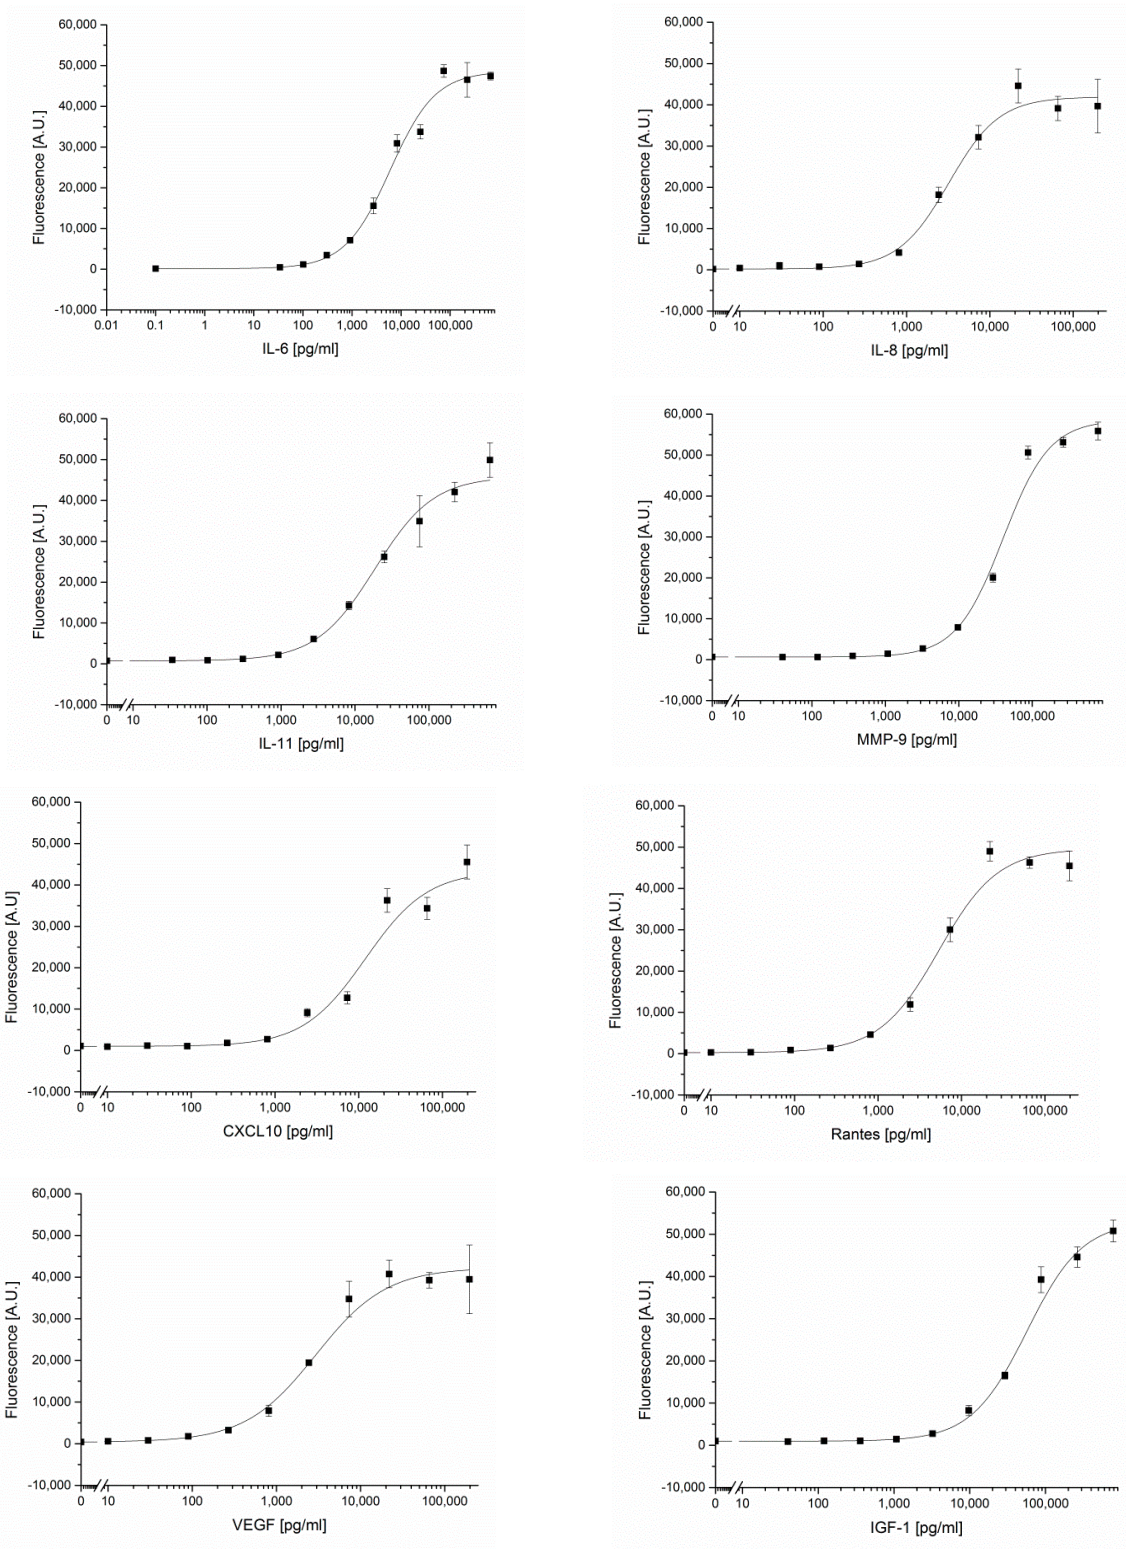

**Figure S1.** Standard curves of IL-6, IL-8, IL-11, MMP-9, CXCL10, Rantes, VEGF, MCP-1, IGFBP-3, and IGF-1 generated with 11 standards using serum-free cell culture medium as a matrix. Background-corrected mean signals were calculated from nine technical replicates and plotted as means  $\pm$  SD. Curves were fitted using a four-parametric model.

**Table S1.** Typical working ranges of standard ELISA kits for single biomarkers in microtiter plate format.

| <b>Biomarker</b> | <b>Range Comm. ELISA<br/>[pg/mL]</b> | <b>Supplier</b>               |
|------------------|--------------------------------------|-------------------------------|
| MCP-1 (CCL2)     | 15.6–1000                            | eBioscience, San Diego, USA   |
| IL-6             | 3.1–200                              | eBioscience, San Diego, USA   |
| Rantes (CCL5)    | 31.2–2000                            | RnD Systems, Minneapolis, USA |
| VEGF             | 15.6–1000                            | RnD Systems, Minneapolis, USA |
| IL-8             | 31.2–2000                            | Biolegend, San Diego, USA     |
| CXCL10 (IP-10)   | 15.6–1000                            | Biolegend, San Diego, USA     |
| IL-11            | 15.6–1000                            | RnD Systems, Minneapolis, USA |
| IGFBP-3          | 800–50,000                           | RnD Systems, Minneapolis, USA |
| MMP-9            | 300–20,000                           | RnD Systems, Minneapolis, USA |
| IGF-1            | 100–6000                             | RnD Systems, Minneapolis, USA |
